# Supplementary material for: Psychophysiological Adaptations to Pilates Training in Overweight and Obese Individuals: A Topical Review
Source: MDPI journal article supplement (doi:10.3390/diseases10040071), 2022-09-29
Supplement: s1 [file s1]

**Table S1.** PubMed/MEDLINE search algorithms and results.

| Search | Query                             | Items found |
|--------|-----------------------------------|-------------|
| 6      | Search (4 AND 5)                  | 21          |
| 5      | Search pilates[Title/Abstract]    | 671         |
| 4      | Search (1 OR 2 OR 3)              | 377,27      |
| 3      | Search overweight[Title/Abstract] | 82,457      |
| 2      | Search obese[Title/Abstract]      | 142,951     |
| 1      | Search obesity[Title/Abstract]    | 298,517     |
